# Supplementary material for: Rapid screening of lipase inhibitors in licorice extract by using porcine pancreatic lipase immobilized on Fe3O4 magnetic nanoparticles
Source: Royal Society of Chemistry journal article supplement (doi:10.1039/d0fo03352a), 2021-01-01
Supplement: d0fo03352a1.pdf [file d0fo03352a1.pdf]

1 **Supplementary material**

2 Tetrahydronethoxychalcone (1): Yellow powder. HR-ESI-MS m/z:  
3 303.0859 [M+H]<sup>+</sup>. <sup>1</sup>H-NMR (DMSO-*d*<sub>6</sub>, 400 MHz)δ<sub>ppm</sub>: 7.80(1H, d,  
4 *J*=15.6 Hz, H-β), 7.62(1H, d, *J*=15.6Hz, H-α), 7.54 (1H, dd, *J*=8.3, 1.9 Hz,  
5 H-6'), 7.48(1H, d, *J*=1.9 Hz, H-2'), 7.30 (1H, d, *J*= 8.6 Hz, H-6), 6.85 (1H,  
6 d, *J*=8.3 Hz, H-5'), 6.63 (1H, d, *J*=8.5 Hz, H-5), 3.77 (3H, s, -OCH<sub>3</sub>). <sup>13</sup>C-  
7 NMR (DMSO-*d*<sub>6</sub>, 100 MHz)δ<sub>ppm</sub>: 187.21(C=O), 150.50 (C-4'), 149.46 (C-  
8 4), 148.46 (C-1), 145.36 (C-3'), 138.29 (C-3), 137.90 (C-β), 129.98 (C-1'),  
9 121.59 (C-6'), 119.51 (C-1), 119.15 (C-α), 118.53 (C-6), 115.23 (C-2'),  
10 115.06 (C-5'), 111.62 (C-5), 60.66 (-OCH<sub>3</sub>).

11 7,4'-Dihydroxyflavone (2): Yellow powder. HR-ESI-MS m/z: 255.0670  
12 [M+H]<sup>+</sup>. <sup>1</sup>H-NMR (DMSO-*d*<sub>6</sub>, 400 MHz) δ<sub>ppm</sub>: 7.92 (2H, d, *J*=8.7 Hz, H-  
13 2', H-6'), 7.87 (1H, d, *J*=8.7 Hz, H-5), 6.97 (2H, d, *J*=2.0 Hz, H-3', H-5'),  
14 6.93 (1H, m, H-3', H-8), 6.90 (2H, d, *J*=2.0 Hz, H-6), 6.73 (1H, s, H-3).  
15 <sup>13</sup>C-NMR (DMSO-*d*<sub>6</sub>, 100 MHz)δ<sub>ppm</sub>: 176.23(C=O), 162.49(C-7), 162.40  
16 (C-2), 160.64 (C-1), 157.33 (C-9), 128.08 (C-2', C-6'), 126.42 (C-5),  
17 121.75 (C-1'), 116.08 (C-3'), 115.85 (C-5'), 114.73 (C-6), 104.44 (C-3),  
18 102.43 (C-8).

19 Licochalcone B (3): Yellow powder. HR-ESI-MS m/z: 287.0938 [M+H]<sup>+</sup>.  
20 <sup>1</sup>H-NMR (DMSO-*d*<sub>6</sub>, 400 MHz)δ<sub>ppm</sub>: 8.01 (2H, d, *J*=8.7Hz, H-2', H-6'),  
21 7.85 (1H, d, *J*=15.6 Hz, H-β), 7.68 (1H, d, *J*=15.6 Hz, H-α), 7.34 (1H, d,

22  $J=8.6$  Hz, H-6), 6.94 (2H, d,  $J=8.7$  Hz, H-3', H-4'), 6.64 (1 H, d,  $J=8.6$  Hz,  
23 H-5), 3.77 (3H, s, -OCH<sub>3</sub>). <sup>13</sup>C-NMR (DMSO-*d*<sub>6</sub>, 100 MHz)  $\delta_{\text{ppm}}$ : 187.14  
24 (C=O), 161.81 (C-4'), 149.53 (C-2), 148.49 (C-4), 138.26 (C- $\beta$ ), 138.09  
25 (C-3), 130.81 (C-2'), 129.49 (C-6'), 119.48 (C-1), 119.04 (C- $\alpha$ ), 118.44 (C-  
26 6), 115.27 (C-3', C-5'), 111.61 (C-5), 60.72 (-OCH<sub>3</sub>).

27 Liquiritigenin (4): White powder. HR-ESI-MS  $m/z$ : 257.0840 [M+H]<sup>+</sup>. <sup>1</sup>H-  
28 NMR (DMSO-*d*<sub>6</sub>, 400 MHz)  $\delta_{\text{ppm}}$ : 7.65 (1H, d,  $J=8.7$  Hz, H-5), 7.33 (2H,  
29 d,  $J=8.5$  Hz, H-2', H-6'), 6.79 (2H, d,  $J=8.5$  Hz, H-3', H-5'), 6.50 (1H, dd,  
30  $J=8.7, 2.1$  Hz, H-6), 6.33 (1H, d,  $J=2.1$  Hz, H-8), 5.44 (1H, dd,  $J=12.9, 2.6$   
31 Hz, H-2), 3.12 (1H, dd,  $J=16.7, 13.0$  Hz, H-3), 2.62 (1H, dd,  $J=16.8, 2.8$   
32 Hz, H-3). <sup>13</sup>C-NMR (DMSO-*d*<sub>6</sub>, 100 MHz)  $\delta_{\text{ppm}}$ : 190.08 (C=O), 164.58 (C-  
33 9), 163.14 (C-7), 157.58 (C-4'), 129.28 (C-5), 128.37 (C-2'), 128.23 (C-6'),  
34 115.09 (C-3', C-5'), 113.50 (C-10), 110.45 (C-6), 102.52 (C-8), 78.93 (C-  
35 2), 43.13 (C-3).

36 Echinatin (5): Yellow powder. HR-ESI-MS  $m/z$ : 271.0933 [M+H]<sup>+</sup>. <sup>1</sup>H-  
37 NMR (DMSO-*d*<sub>6</sub>, 400 MHz)  $\delta_{\text{ppm}}$ : 10.33 (1H, s, 4-OH), 10.15 (1H, s, 4'-  
38 OH), 7.99 (2H, d,  $J=8.6$  Hz, H-2', H-6'), 7.92 (1H, d,  $J=15.6$  Hz, H- $\beta$ ), 7.77  
39 (1H, d,  $J=8.4$  Hz, H-6), 7.66 (1H, d,  $J=15.6$  Hz, H- $\alpha$ ), 6.87 (2H, d,  $J=8.7$   
40 Hz, H-3', H-5'), 6.47 (1H, s, H-3), 6.44 (1H, d,  $J=8.5$  Hz, H-5), 3.84 (3H,  
41 s, -OCH<sub>3</sub>). <sup>13</sup>C-NMR (DMSO-*d*<sub>6</sub>, 100 MHz)  $\delta_{\text{ppm}}$ : 187.15 (C=O), 161.72 (C-  
42 4'), 161.52 (C-4), 159.96 (C-2), 137.87 (C- $\beta$ ), 130.76 (C-2', C-6'), 130.04

43 (C-6), 129.58 (C-1'), 117.97 (C- $\alpha$ ), 115.23 (C-3', C-5'), 114.52 (C-1),  
44 108.12 (C-5), 99.00 (C-3), 55.48 (2-OCH<sub>3</sub>).

45 Isoliquiritigenin (6): Yellow powder. HR-ESI-MS m/z: 257.0839 [M+H]<sup>+</sup>.

46 <sup>1</sup>H-NMR (DMSO-*d*<sub>6</sub>, 400 MHz) $\delta_{\text{ppm}}$ : 13.61(1H, s, 2'-OH), 10.64(1H, s, 4'-

47 OH), 10.16 (1H, s, 4-OH), 8.14 (1H, d, *J*=8.9 Hz, H-6'), 7.76 (4H, m, H-2,

48 H-6, H- $\beta$ , H- $\alpha$ ), 6.84 (2H, d, *J*=8.9 Hz, H-3, 5), 6.41 (1H, dd, *J*=8.9, 2.2

49 Hz, H-5'), 6.28 (1H, d, *J*=2.2 Hz, H-3'). <sup>13</sup>C-NMR (DMSO-*d*<sub>6</sub>, 100

50 MHz) $\delta_{\text{ppm}}$ : 191.50(C=O), 165.76 (C-4'), 164.92 (C-2'), 160.24 (C-4),

51 144.24 (C- $\beta$ ), 132.82 (C-6'), 131.91 (C-2, C-6), 125.72 (C-1), 117.38 (C-

52  $\alpha$ ), 115.81 (C-3, C-5), 112.97 (C-1'), 108.06 (C-5'), 102.55 (C-3') .

53 Inflacoumarin A (7): White powder. HR-ESI-MS m/z: 323.1290 [M+H]<sup>+</sup>.

54 <sup>1</sup>H-NMR(DMSO-*d*<sub>6</sub>, 400 MHz) $\delta_{\text{ppm}}$ : 10.86(1H, s, 7-OH), 10.25(1H, s, 4-

55 OH), 7.90 (2H, d, *J*=8.7 Hz, H-3', H-5'), 7.67 (1H, s, H-5), 6.98 (1H, s, H-

56 8), 6.92 (2H, d, *J*=8.7 Hz, H-2', H-6'), 6.71 (1H, s, H-3), 5.33 (1H, t, *J*=7.3

57 Hz, H-2''), 3.30 (1H, d, *J*=7.3 Hz, H-1''), 1.74 (1H, s, H-4''), 1.69 (1H, s,

58 H-5''). <sup>13</sup>C-NMR (DMSO-*d*<sub>6</sub>, 100 MHz) $\delta_{\text{ppm}}$ : 176.22 (C-4), 162.18 (C-2),

59 160.55 (C-4'), 160.35 (C-7), 155.62 (C-9), 132.38 (C-3''), 128.00 (C-2', C-

60 6'), 127.23 (C-6), 124.54 (C-5), 121.85 (C-1'), 121.76 (C-1''), 115.84 (C-

61 3', C-5'), 115.76 (C-10), 104.43 (C-3), 101.73 (C-8), 27.50 (C-1''), 25.56

62 (C-4''), 17.60 (C-5'').

63 Licochalcone D (8): Yellow powder. HR-ESI-MS  $m/z$ : 355.1538  $[M+H]^+$ .

64  $^1\text{H-NMR}$  ( $\text{DMSO-}d_6$ , 400 MHz) $\delta_{\text{ppm}}$ : 7.85(1H, d,  $J=8.4$  Hz, H-6'), 7.81(1H,

65 d,  $J=15.6$  Hz, H- $\beta$ ), 7.65 (1H, d,  $J=15.6$  Hz, H- $\alpha$ ), 7.31 (1H, d,  $J=8.6$  Hz,

66 H-6), 6.90 (1H, d,  $J=8.4$  Hz, H-5'), 6.64 (1H, d,  $J=8.5$  Hz, H-5), 5.36 (1H,

67 m, H-2''), 3.77 (3H, s,  $-\text{OCH}_3$ ), 3.29 (1H, d,  $J=7.2$ Hz, H-1''), 1.70 (3H, s,

68 4''- $\text{CH}_3$ ), 1.70 (3H, s, 5''- $\text{CH}_3$ ).  $^{13}\text{C-NMR}$ ( $\text{DMSO-}d_6$ , 100 MHz) $\delta_{\text{ppm}}$ :

69 187.34 (C=O), 159.61 (C-4'), 148.45 (C-2), 149.52 (C-4), 138.29 (C- $\beta$ ),

70 138.01 (C-3), 131.69 (C-1'), 130.13 (C-6'), 129.46 (C-3''), 127.82 (C-2'),

71 122.39 (C-2'), 119.48 (C-1), 119.20 (C- $\alpha$ ), 118.57 (C-6), 114.56 (C-5'),

72 111.60 (C-5), 60.65 ( $-\text{OCH}_3$ ), 28.01 (C-1''), 25.50 (C-4''), 17.67 (C-5'').

73 Licochalcone E (9): Yellow powder. HR-ESI-MS  $m/z$ : 339.1593  $[M+H]^+$ .

74  $^1\text{H-NMR}$  ( $\text{DMSO-}d_6$ , 400 MHz) $\delta_{\text{ppm}}$ : 7.97 (2H, d,  $J=8.7$  Hz, H-2', 6'), 7.89

75 (1H, d,  $J=15.6$  Hz, H- $\beta$ ), 7.58 (1H, d,  $J=15.6$  Hz, H- $\alpha$ ), 7.47 (1H, s, H-6),

76 6.88 (2H, d,  $J=8.7$  Hz, H-3', H-5'), 6.53 (1H, s, H-3), 4.82 (2H, s, H-3''),

77 3.83 (3H, s,  $-\text{OCH}_3$ ), 3.68 (1H, m, H-1''), 1.62 (3H, s, 5''- $\text{CH}_3$ ), 1.31 (3H,

78 d,  $J=7.1$  Hz, H-4'').  $^{13}\text{C-NMR}$  ( $\text{DMSO-}d_6$ , 100 MHz) $\delta_{\text{ppm}}$ : 187.24(C=O),

79 161.70 (C-4'), 158.07 (C-4), 148.54 (C-2''), 138.52 (C- $\beta$ ), 130.73 (C-2', C-

80 6'), 129.58 (C-1'), 127.92 (C-6), 123.84 (C-5), 117.80 (C- $\alpha$ ), 115.25 (C-3',

81 C-5'), 114.20 (C-1), 109.62 (C-3''), 98.76 (C-3), 55.43 ( $-\text{OCH}_3$ ), 37.30 (C-

82 1''), 21.80 (C-5''), 18.96 (C-4'').

83 Licochalcone A (10): Orange powder. HR-ESI-MS m/z: 339.1595 [M+H]<sup>+</sup>.  
84 <sup>1</sup>H-NMR(DMSO-*d*<sub>6</sub>, 400 MHz)δ<sub>ppm</sub>: 7.97(2H, d, *J*=8.7 Hz, H-2', H-6'),  
85 7.90 (1H, d, *J*=15.6Hz, H-β), 7.60 (1H, s, H-6), 6.88 (2H, d, *J*=8.6 Hz, H-  
86 3', H-5'), 6.52 (1H, s, H-3), 6.29 (1H, dd, *J*=17.8, 10.3 Hz, H-2''), 4.95 (1H,  
87 d, *J*=2.3 Hz, H-3''b), 4.92 (1H, d, *J*=2.2 Hz, H-3''a), 3.83 (3H, s, -OCH<sub>3</sub>),  
88 1.45 (6H, s, -CH<sub>3</sub>). <sup>13</sup>C-NMR (DMSO-*d*<sub>6</sub>, 100 MHz)δ<sub>ppm</sub>: 187.25 (C=O),  
89 161.67 (C-4), 159.69 (C-4'), 158.26 (C-2), 147.47 (C-2''), 138.70 (C-β),  
90 130.73 (C-1'), 129.62 (C-6), 127.74 (C-5), 117.76 (C-α), 115.25 (C-1),  
91 113.50 (C-3', C-5'), 110.02 (C-3''), 99.90 (C-3), 55.43 (-OCH<sub>3</sub>), 26.97 (C-  
92 4'', C-5'').

93 Glabrone (11): Yellowish powder. HR-ESI-MS m/z: 337.1096 [M+H]<sup>+</sup>. <sup>1</sup>H-  
94 NMR (DMSO-*d*<sub>6</sub>, 400 MHz)δ<sub>ppm</sub>: 8.27 (1H, s, H-2), 7.99 (1H, d, *J*=8.8, H-  
95 5), 6.97 (1H, dd, *J*=8.8, 2.1 Hz, H-6), 6.93 (1H, d, *J*=8.3 Hz, H-6'), 6.91  
96 (1H, d, *J*=2.1 Hz, H-8), 6.68 (1H, d, *J*=10 Hz, H-4''), 5.69 (1H, d, *J*=10 Hz,  
97 H-3''), 1.38 (6H, s, H-5'', H-6''). <sup>13</sup>C-NMR(DMSO-*d*<sub>6</sub>, 100 MHz) δ<sub>ppm</sub>:  
98 176.01 (C=O), 162.78 (C-7), 157.55 (C-8a), 155.16 (C-2), 153.55 (C-4'),  
99 151.34 (C-2'), 131.00 (C-6'), 128.84 (C-3''), 127.25 (C-5), 122.06 (C-3),  
100 117.03 (C-4''), 116.21 (C-4a), 115.36 (C-6), 112.75 (C-1'), 110.06 (C-3'),  
101 107.62 (C-5'), 102.03 (C-8), 75.44 (C-2''), 27.48 (C-5'', C-6'').

102 Licoisoflavone B (12): Yellow powder. HR-ESI-MS m/z: 353.1009  
103 [M+H]<sup>+</sup>. <sup>1</sup>H-NMR (DMSO-*d*<sub>6</sub>, 400 MHz)δ<sub>ppm</sub>: 8.19 (1H, s, H-2), 6.89 (1H,

104 d,  $J=8.1$  Hz, H-6'), 6.67 (1H, d,  $J=10.0$  Hz, H-1''), 6.39 (1H, d,  $J=1.7$  Hz,  
105 H-8'), 6.33 (1H, d,  $J=8.2$  Hz, H-5'), 6.22 (1H, d,  $J=1.7$  Hz, H-6), 5.69 (1H,  
106 d,  $J=10.0$  Hz, H-2''), 1.67 (6H, s, H-4'', H-5'').  $^{13}\text{C-NMR}$  (DMSO- $d_6$ , 100  
107 MHz) $\delta_{\text{ppm}}$ : 180.53 (C=O), 164.50 (C-7), 161.78 (C-5), 157.73 (C-9),  
108 1505.65 (C-4'), 153.57 (C-2), 151.20 (C-2'), 131.36 (C-6'), 128.83 (C-2''),  
109 120.46 (C-3), 116.97 (C-1''), 111.24 (C-1'), 109.73 (C-3'), 107.38 (C-5'),  
110 98.96 (C-6), 93.69 (C-8), 75.39 (C-3''), 27.45 (C-4'', C-5'').

111 Glycyuralin R (13): White powder. HR-ESI-MS  $m/z$ : 391.1889  $[\text{M}+\text{H}]^+$ .

112  $^1\text{H-NMR}$  (DMSO- $d_6$ , 400 MHz) $\delta_{\text{ppm}}$ : 10.81 (1H, s, 7-OH), 10.19 (1H, s, 4-  
113 OH), 7.74 (1H, d,  $J=2.0$ Hz, H-2'), 7.66 (1H, s, H-5), 6.97 (1H, s, H-8), 6.67  
114 (1H, s, H-3), 5.33 (1H, m, H-2''), 3.30 (2H, d,  $J=7.3$ Hz, H-1''), 3.30 (2H,  
115 d,  $J=7.3$  Hz, H-1'''), 1.74 (3H, s, H-5''), 1.72 (3H, s, H-4'''), 1.72 (3H, s, H-  
116 5'''), 1.69 (3H, s, H-4'').  $^{13}\text{C-NMR}$ (DMSO- $d_6$ , 100 MHz)  $\delta_{\text{ppm}}$ : 176.19 (C-  
117 4), 162.38 (C-2), 160.32 (C-7), 158.33 (C-4'), 155.59 (C-9), 132.38 (C-3''),  
118 131.76 (C-3'''), 128.36 (C-3'), 127.43 (C-2'), 127.18 (C-6), 125.41 (C-6'),  
119 124.55 (C-6'), 122.33 (C-4), 121.76 (C-2'), 115.77 (C-10), 115.29 (C-5'),  
120 104.33 (C-3), 101.70 (C-8), 28.05 (C-1'''), 27.49 (C-1''), 25.56 (C-5''),  
121 25.50 (C-5'''), 17.68 (C-4'''), 17.60 (C-4'').

122

123

124

125

126

127

128

129 **Table S1** The linear range, precision and recovery of compounds.

| Compound                 | Linear range<br>(mg/L) | $R^2$  | LOQ<br>(mg/L) | LOD<br>(mg/L) | Precision RSD (%) |          | Recovery<br>yield (%) |
|--------------------------|------------------------|--------|---------------|---------------|-------------------|----------|-----------------------|
|                          |                        |        |               |               | Intraday          | Interday |                       |
| Licochalcone B           | 4.2-66.6               | 0.9997 | 1.21          | 0.36          | 2.19              | 2.98     | 97.84                 |
| Terahydronethoxychalcone | 4.9-79.3               | 0.9997 | 2.54          | 0.76          | 2.56              | 2.22     | 98.75                 |
| Echinatin                | 5.2-83.3               | 0.9997 | 0.94          | 0.28          | 2.35              | 2.94     | 98.68                 |
| Isoliquiritigenin        | 7.3-115.3              | 0.9996 | 1.07          | 0.32          | 2.60              | 3.02     | 97.47                 |
| Licochalcone D           | 5.3-86.0               | 0.9998 | 2.11          | 0.63          | 2.35              | 2.87     | 97.74                 |
| Licochalcone E           | 6.2-98.7               | 0.9996 | 3.60          | 1.08          | 2.33              | 2.67     | 96.86                 |
| Licochalcone A           | 4.7-74.7               | 0.9997 | 1.47          | 0.44          | 2.99              | 2.46     | 95.68                 |

130

131

132
